# Supplementary material for: Data resource profile: COVid VAXines effects on the aged (COVVAXAGE)
Source: PubMed Central journal article supplement — Int J Popul Data Sci. 2023 Oct 16;8(6):2170. doi: 10.23889/ijpds.v8i6.2170 (PMC10900297; doi:10.23889/ijpds.v8i6.2170), 2023-10-16

## Supplementary Appendix

### Methods Supplementary

#### Data sources and Medicare claims files

The following files from the Center for Medicare and Medicaid Services (CMS) were the primary data used after the CVS and Walgreens customer data were matched to a Medicare beneficiary (January 2016 to August 2022): Common Medicare Environment/Medicare Beneficiary Summary File (MBSF; demographics, enrollment, cost/utilization, history of chronic conditions); Medicare Parts A and B claims (e.g., inpatient, outpatient, carrier, long-term care claims, which include vaccination billings that would occur outside of the pharmacy setting), Medicare Advantage Encounter Data (outpatient/carrier encounters for Medicare Advantage enrollees; available through December 2020), and Part D

event data (prescription drug claims). Medicare claims data are administrative billing data generated through healthcare encounters (e.g., physician visits, hospitalizations) that can be used to derive longitudinal information about vaccine receipt, diagnoses, medication use, facilities use, healthcare utilization, and other clinical variables. Diagnoses are provided via International Classification of Diseases, Tenth Revision, Clinical Modification (ICD-10-CM) codes [33]. Procedures (including vaccination events, diagnostic testing, etc.) are captured via Common Procedural Terminology (CPT) codes. Medical devices and supply use are captured using Healthcare Common Procedure Coding System (HCPCS) codes. Other CMS files available for linkage include the Outcome and Assessment Information Set (OASIS; 2016-2020), the Inpatient Rehab Facility-Patient Assessment Instrument (IRF-PAI; 2016-2020), and the Long-term Care Minimum Data Set (MDS (2016-2022)).

Supplementary Table 1: Common Procedural Terminology (CPT) Codes used to Identify COVID-19 vaccinations in Medicare claims data

| Vaccine type, Dose | Manufacturer      | Dose         | CPT Code |
|--------------------|-------------------|--------------|----------|
| BNT162b2           | Pfizer, BioNTech  | Dose 1       | 0001A    |
| mRNA-1273          | Moderna           | Dose 1       | 0011A    |
| JNJ-78436735       | Johnson & Johnson | Dose 1       | 0034A    |
| BNT162b2           | Pfizer, BioNTech  | Dose 2       | 0002A    |
| mRNA-1273          | Moderna           | Dose 2       | 0012A    |
| BNT162b2           | Pfizer, BioNTech  | Dose 3       | 0003A    |
| BNT162b2           | Pfizer, BioNTech  | Booster Dose | 0004A    |
| BNT162b2           | Pfizer, BioNTech  | Booster Dose | 0124A    |
| JNJ-78436735       | Johnson & Johnson | Booster Dose | 0031A    |
| mRNA-1273          | Moderna           | Booster Dose | 0134A    |
| mRNA-1273          | Moderna           | Dose 3       | 0013A    |
| mRNA-1273          | Moderna           | Booster Dose | 0064A    |

Supplementary Table 2.1: Number of CVS Health IDs by match/no-match across all records (vaccine and drug history)

| Type of record | Match type                                 | All CVS Health IDs |        | CVS Health IDs 65+ |        |
|----------------|--------------------------------------------|--------------------|--------|--------------------|--------|
|                |                                            | #                  | %      | #                  | %      |
| <i>Total</i>   |                                            | 27,086,723         | 100.0% | 22,165,224         | 100.0% |
| All Records    | Match                                      | 24,016,176         | 88.7%  | 20,906,184         | 94.3%  |
|                | One CVS Health ID to One BID               | 20,138,112         | 74.3%  | 17,574,851         | 79.3%  |
|                | Many CVS Health IDs to One BID             | 1,541,987          | 5.7%   | 1,340,133          | 6.0%   |
|                | Many BIDs to One CVS Health ID, Resolved   | 2,336,077          | 8.6%   | 1,991,200          | 9.0%   |
|                | No Match                                   | 3,070,547          | 11.3%  | 1,259,040          | 5.7%   |
|                | Potential Candidates not found             | 2,761,956          | 10.2%  | 1,105,319          | 5.0%   |
|                | Many BIDs to One CVS Health ID, Unresolved | 308,591            | 1.1%   | 153,721            | 0.7%   |

Supplementary Table 2.2: Number of Walgreens IDs by match/no-match across all records (vaccine and drug history)

| Type of record | Match type                          | All Walgreens IDs |        | Walgreens IDs 65+ |        |
|----------------|-------------------------------------|-------------------|--------|-------------------|--------|
|                |                                     | #                 | %      | #                 | %      |
| <i>Total</i>   |                                     | 23,510,025        | 100.0% | 19,069,353        | 100.0% |
| All Records    | Match                               | 22,519,900        | 95.8%  | 18,311,833        | 96.0%  |
|                | One WAG ID to One BID               | 20,216,716        | 86.0%  | 16,412,633        | 86.1%  |
|                | Many WAG IDs to One BID             | 1,424,560         | 6.1%   | 1,164,851         | 6.1%   |
|                | Many BIDs to One WAG ID, Resolved   | 878,624           | 3.7%   | 734,349           | 3.9%   |
|                | No Match                            | 990,125           | 4.2%   | 757,520           | 4.0%   |
|                | Potential Candidates not found      | 818,512           | 3.5%   | 618,630           | 3.2%   |
|                | Many BIDs to One WAG ID, Unresolved | 171,613           | 0.7%   | 138,890           | 0.7%   |

BID – Medicare beneficiary identifier. WAG – Walgreens.

Supplementary Table 2.3: Summary of matched Medicare beneficiary IDs (BIDs) in the COVID VAXines Effects on the Aged (COVVAXAGE) database alive and with a valid address at first observable week of Medicare enrollment\*

| Data source                   | BIDs       |         |            |         |
|-------------------------------|------------|---------|------------|---------|
|                               | Total      |         | Age 65+    |         |
|                               | n          | %       | n          | %       |
| Total                         | 38,116,281 | 100.00% | 28,251,114 | 100.00% |
| CVS Health customer only      | 16,472,713 | 43.22%  | 12,573,226 | 44.51%  |
| Walgreens customer only       | 15,398,313 | 40.40%  | 10,600,585 | 37.52%  |
| Both CVS Health and Walgreens | 6,245,255  | 16.38%  | 5,077,303  | 17.97%  |

BID – Medicare beneficiary identifier.

\*N = 134,592 beneficiaries died or had an invalid address before their first observable week of Medicare enrollment.

Supplementary Table 3: Characteristics of Matched versus Unmatched IDs (age 65+ only) from CVS Health and Walgreens Databases

|                                 | Matched to medicare Beneficiary | Not matched | aSMD |
|---------------------------------|---------------------------------|-------------|------|
| CVS Health                      |                                 |             |      |
| Average Age in years, mean (SD) | 73.8 (7.2)                      | 73.0 (8.1)  | 0.09 |
| % Female                        | 57%                             | 39%         | 0.37 |
| Walgreens                       |                                 |             |      |
| Average Age in years, mean (SD) | 74.0 (7.1)                      | 74.0 (7.6)  | 0.12 |
| % Female                        | 59%                             | 39%         | 0.41 |

aSMD-absolute standardized mean difference. An aSMD > 0.10 (10%) is considered to be a large enough difference to be potentially important [24].

Supplementary Table 4: Counts and percentages of beneficiaries with a first dose of a COVID-19 vaccination identified via a medicare claim only, a pharmacy record only, or both, over time in the COVid VAXines effects on the aged (COVVAXAGE) database

| year | Month | Medicare only, n | Pharmacy only, n | Both medicare & pharmacy, n | Total N   | % Medicare* | % Pharmacy* | % Both* |
|------|-------|------------------|------------------|-----------------------------|-----------|-------------|-------------|---------|
| 2020 | Dec   | 47,026           | 39,832           | 183,081                     | 269,939   | 17.42%      | 14.76%      | 67.82%  |
| 2021 | Jan   | 3,427,518        | 275,920          | 1,431,237                   | 5,134,675 | 66.75%      | 5.37%       | 27.87%  |
|      | Feb   | 3,349,877        | 234,168          | 1,273,435                   | 4,857,480 | 68.96%      | 4.82%       | 26.22%  |
|      | Mar   | 2,006,305        | 158,765          | 644,657                     | 2,809,727 | 71.41%      | 5.65%       | 22.94%  |
|      | Apr   | 768,656          | 89,367           | 303,228                     | 1,161,251 | 66.19%      | 7.70%       | 26.11%  |
|      | May   | 363,536          | 78,693           | 237,167                     | 679,396   | 53.51%      | 11.58%      | 34.91%  |
|      | Jun   | 127,969          | 41,096           | 105,090                     | 274,155   | 46.68%      | 14.99%      | 38.33%  |
|      | Jul   | 139,006          | 55,760           | 138,600                     | 333,366   | 41.70%      | 16.73%      | 41.58%  |
|      | Aug   | 218,393          | 89,011           | 193,662                     | 501,066   | 43.59%      | 17.76%      | 38.65%  |

\*percentage of total vaccines administered in that month.

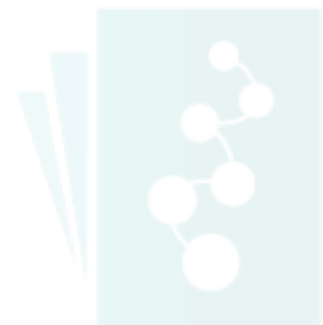

Supplement: ijpds-08-2170-s001.pdf [file ijpds-08-2170-s001.pdf]
